# Supplementary material
Source: PubMed Central journal article supplement (PMC2759651)
Supplement: blood-2009-03-212969_2.pdf [file blood-2009-03-212969_2.pdf]

| chr | start position | end position | chr region | p-value | adjusted p-value | # input genes in the region | # genes in the region | % enrichment |
|-----|----------------|--------------|------------|---------|------------------|-----------------------------|-----------------------|--------------|
| 12  | 6727434        | 6750379      | p13.31     | 0.00790 | 0.03962          | 2                           | 2                     | 100.00%      |
| 12  | 14818672       | 15026066     | p12.3      | 0.00209 | 0.03434          | 4                           | 8                     | 50.00%       |
| 12  | 14818672       | 14847668     | p12.3      | 0.00790 | 0.03962          | 2                           | 2                     | 100.00%      |
| 12  | 14986232       | 15026066     | p12.3      | 0.00790 | 0.03962          | 2                           | 2                     | 100.00%      |
| 12  | 32003620       | 32789750     | p11.21     | 0.00129 | 0.02848          | 4                           | 7                     | 57.14%       |
| 12  | 32723491       | 32789750     | p11.21     | 0.00790 | 0.03962          | 2                           | 2                     | 100.00%      |
| 12  | 54396088       | 54501736     | q13.2      | 0.00012 | 0.01349          | 5                           | 7                     | 71.43%       |
| 12  | 54832471       | 54841627     | q13.2      | 0.00790 | 0.03962          | 2                           | 2                     | 100.00%      |
| 12  | 55443375       | 55791428     | q13.3      | 0.00639 | 0.03962          | 4                           | 11                    | 36.36%       |
| 12  | 56303460       | 56401605     | q14.1      | 0.00790 | 0.03962          | 2                           | 2                     | 100.00%      |
| 12  | 67919663       | 68281624     | q15        | 0.00760 | 0.03962          | 3                           | 6                     | 50.00%       |
| 12  | 67919663       | 68034280     | q15        | 0.00790 | 0.03962          | 2                           | 2                     | 100.00%      |
| 12  | 92326221       | 93377851     | q22        | 0.00002 | 0.01164          | 6                           | 8                     | 75.00%       |
| 12  | 94891273       | 94953496     | q23.1      | 0.00790 | 0.03962          | 2                           | 2                     | 100.00%      |
| 12  | 108851992      | 109273278    | q24.11     | 0.00760 | 0.03962          | 3                           | 6                     | 50.00%       |
| 12  | 109046687      | 109273278    | q24.11     | 0.00790 | 0.03962          | 2                           | 2                     | 100.00%      |
| 12  | 119263516      | 119391941    | q24.31     | 0.00461 | 0.03962          | 3                           | 5                     | 60.00%       |
